# Supplementary material for: Physical insights into the Au growth on the surface of a LaAlO3/SrTiO3 heterointerface
Source: Royal Society of Chemistry journal article supplement (doi:10.1039/d2ra04038g), 2022-01-01
Supplement: d2ra04038g1.pdf [file d2ra04038g1.pdf]

Electronic Supplementary Information

## Physical Insights into Au Growth on Surface of LaAlO<sub>3</sub>/SrTiO<sub>3</sub> Heterointerface

Ong Kim Le<sup>1,2</sup>, Viorel Chihai<sup>3</sup>, Phan Thi Hong Hoa<sup>1,2</sup>, Pham Thanh Hai<sup>1,2</sup>, Do Ngoc Son<sup>1,2,\*</sup>

<sup>1</sup>Ho Chi Minh City University of Technology (HCMUT), 268 Ly Thuong Kiet Street, District 10, Ho Chi Minh City, Vietnam

<sup>2</sup>Vietnam National University Ho Chi Minh City, Linh Trung Ward, Ho Chi Minh City, Vietnam

<sup>3</sup>Institute of Physical Chemistry "Ilie Murgulescu" of the Romanian Academy, Splaiul Independentei 202, Sector 6, 060021 Bucharest, Romania

\*Email: [dnson@hcmut.edu.vn](mailto:dnson@hcmut.edu.vn)

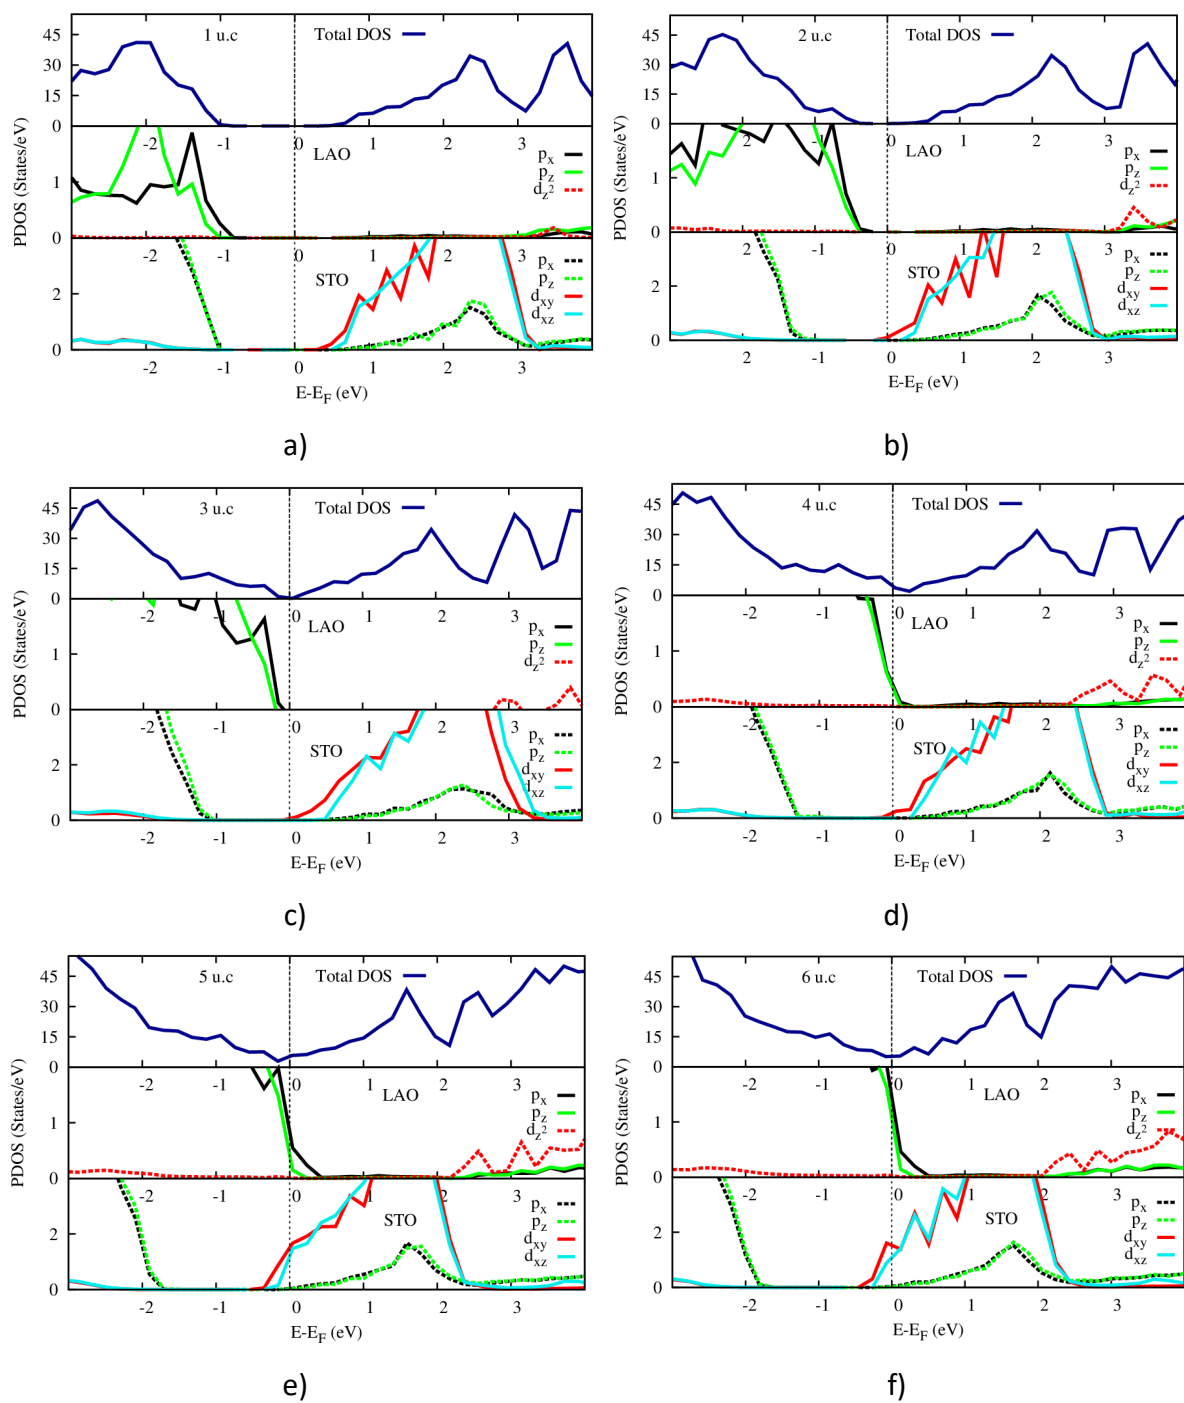

**Figure S.** The orbital-projected density of states (PDOS) of the  $(\text{LAO})_m/(\text{STO})_6$  system,  $m = 1 - 6$  layers. Figures a) – f) correspond to the heterointerface with the LAO film thickness of 1 to 6 unit cells. The bandgap value is 1.41, 0.65, and 0.25 eV for the LAO film thickness of 1 to 3 unit cells, and that is 0 eV for the LAO film thickness  $\geq 4$  unit cells.
